# Supplementary material for: Consumption-based accounting of steel alloying elements and greenhouse gas emissions associated with the metal use: the case of Japan
Source: Springer Nature journal article supplement (doi:10.1186/s40008-016-0060-9), 2016-12-01
Supplement: MOESM1 [file 11951680]

**Sharing the Responsibility for Metal Use: The Case of Japan as a Distributor of Steel Alloying Elements**

**Additional file 1: List of commodities considered in the analysis**

Table List of commodities in the IO table with their contribution in indirect exports of alloying element and top 3 counter partners of exports

|  |  |  | Alloying elements mass accompanying with Export (t) | | | |  | Top 3 counter partner of export in terms of mass of accompanying alloying element | | |
| --- | --- | --- | --- | --- | --- | --- | --- | --- | --- | --- |
| No. | Commodity | Category | Mn | Cr | Ni | Mo |  | 1 | 2 | 3 |
| 1 | Rice | Product | 0 | 0 | 0 | 0 |  | - | - | - |
| 2 | Wheat (domestic) | Product | 0 | 0 | 0 | 0 |  | - | - | - |
| 3 | Sweet potatoes | Product | 0 | 0 | 0 | 0 |  | - | - | - |
| 4 | Soybeans (domestic) | Product | 0 | 0 | 0 | 0 |  | - | - | - |
| 5 | Vegetables | Product | 0 | 0 | 0 | 0 |  | - | - | - |
| 6 | Citrus fruits | Product | 0 | 0 | 0 | 0 |  | - | - | - |
| 7 | Sugar crops | Product | 0 | 0 | 0 | 0 |  | - | - | - |
| 8 | Green coffee and cocoa beans (imported) | Product | 0 | 0 | 0 | 0 |  | - | - | - |
| 9 | Miscellaneous cereals | Product | 0 | 0 | 0 | 0 |  | - | - | - |
| 10 | Crops for feed and forage | Product | 0 | 0 | 0 | 0 |  | - | - | - |
| 11 | Seeds and seedlings | Product | 0 | 0 | 0 | 0 |  | - | - | - |
| 12 | Flowers and plants | Product | 0 | 0 | 0 | 0 |  | - | - | - |
| 13 | Leaf tobacco | Product | 0 | 0 | 0 | 0 |  | - | - | - |
| 14 | Raw milk | Product | 0 | 0 | 0 | 0 |  | - | - | - |
| 15 | Hen eggs | Product | 0 | 0 | 0 | 0 |  | - | - | - |
| 16 | Fowls and broilers | Product | 0 | 0 | 0 | 0 |  | - | - | - |
| 17 | Hogs | Product | 0 | 0 | 0 | 0 |  | - | - | - |
| 18 | Beef cattle | Product | 0 | 0 | 0 | 0 |  | - | - | - |
| 19 | Sheep and lamp wool | Product | 0 | 0 | 0 | 0 |  | - | - | - |
| 20 | Veterinary service | Product | 0 | 0 | 0 | 0 |  | - | - | - |
| 21 | Agricultural services (except veterinary service) | Product | 0 | 0 | 0 | 0 |  | - | - | - |
| 22 | Silviculture | Product | 0 | 0 | 0 | 0 |  | - | - | - |
| 23 | Logs (domestic) | Product | 0 | 0 | 0 | 0 |  | - | - | - |
| 24 | Special forest products (inc. hunting) | Product | 0 | 0 | 0 | 0 |  | - | - | - |
| 25 | Marine fisheries (domestic) | Product | 0 | 0 | 0 | 0 |  | - | - | - |
| 26 | Marine culture | Product | 1 | 1 | 0 | 0 |  | - | - | - |
| 27 | Inland water fisheries and culture | Product | 0 | 0 | 0 | 0 |  | - | - | - |
| 28 | Beef meat (bone meat) | Product | 1 | 0 | 0 | 0 |  | - | - | - |
| 29 | Processed meat products | Product | 0 | 0 | 0 | 0 |  | - | - | - |
| 30 | Bottled or canned meat products | Product | 0 | 0 | 0 | 0 |  | - | - | - |
| 31 | Drinking milk | Product | 0 | 0 | 0 | 0 |  | - | - | - |
| 32 | Frozen fish and shellfish | Product | 0 | 1 | 0 | 0 |  | - | - | - |
| 33 | Salted, dried or smoked seafood | Product | 0 | 0 | 0 | 0 |  | - | - | - |
| 34 | Bottled or canned seafood | Product | 1 | 0 | 0 | 0 |  | - | - | - |
| 35 | Fish paste | Product | 0 | 0 | 0 | 0 |  | - | - | - |
| 36 | Other processed seafood | Product | 3 | 1 | 1 | 0 |  | Hong Kong | USA | Taiwan |
| 37 | Milled rice | Product | 0 | 0 | 0 | 0 |  | - | - | - |
| 38 | Wheat flour | Product | 0 | 0 | 0 | 0 |  | - | - | - |
| 39 | Noodles | Product | 0 | 0 | 0 | 0 |  | - | - | - |
| 40 | Bread | Product | 0 | 0 | 0 | 0 |  | - | - | - |
|  |  |  | Alloying elements mass accompanying with Export (t) | | | |  | Top 3 counter partner of export in terms of mass of accompanying alloying element | | |
| No. | Commodity | Category | Mn | Cr | Ni | Mo |  | 1 | 2 | 3 |
| 41 | Confectionery | Product | 1 | 1 | 0 | 0 |  | - | - | - |
| 42 | Bottled or canned vegetables and fruits | Product | 1 | 0 | 0 | 0 |  | - | - | - |
| 43 | Preserved agricultural foodstuffs (other than bottled or canned) | Product | 0 | 0 | 0 | 0 |  | - | - | - |
| 44 | Refined sugar | Product | 0 | 0 | 0 | 0 |  | - | - | - |
| 45 | Starch | Product | 0 | 0 | 0 | 0 |  | - | - | - |
| 46 | Dextrose, syrup and isomerized sugar | Product | 0 | 0 | 0 | 0 |  | - | - | - |
| 47 | Vegetable oil | Product | 1 | 0 | 0 | 0 |  | - | - | - |
| 48 | Animal oils and fats | Product | 1 | 0 | 0 | 0 |  | - | - | - |
| 49 | Condiments and seasonings | Product | 4 | 2 | 1 | 0 |  | USA | China | Taiwan |
| 50 | Prepared frozen foods | Product | 0 | 0 | 0 | 0 |  | - | - | - |
| 51 | Retort foods | Product | 0 | 0 | 0 | 0 |  | - | - | - |
| 52 | Dishes, sushi and lunch boxes | Product | 0 | 0 | 0 | 0 |  | - | - | - |
| 53 | School lunch (public) | Product | 0 | 0 | 0 | 0 |  | - | - | - |
| 54 | School lunch (private) | Product | 0 | 0 | 0 | 0 |  | - | - | - |
| 55 | Other foods | Product | 2 | 1 | 0 | 0 |  | - | - | - |
| 56 | Refined sake | Product | 1 | 0 | 0 | 0 |  | - | - | - |
| 57 | Beer | Product | 1 | 1 | 0 | 0 |  | - | - | - |
| 58 | Whiskey and brandy | Product | 0 | 0 | 0 | 0 |  | - | - | - |
| 59 | Other liquors | Product | 1 | 1 | 0 | 0 |  | - | - | - |
| 60 | Tea and roasted coffee | Product | 2 | 0 | 0 | 0 |  | - | - | - |
| 61 | Soft drinks | Product | 3 | 2 | 1 | 0 |  | UAE | USA | Hong Kong |
| 62 | Manufactured ice | Product | 0 | 0 | 0 | 0 |  | - | - | - |
| 63 | Feeds | Product | 1 | 0 | 0 | 0 |  | - | - | - |
| 64 | Organic fertilizers, n.e.c. | Product | 0 | 0 | 0 | 0 |  | - | - | - |
| 65 | Tobacco | Product | 0 | 0 | 0 | 0 |  | - | - | - |
| 66 | Fiber yarns | Product | 0 | 0 | 0 | 0 |  | - | - | - |
| 67 | Cotton and staple fiber fabrics (inc. fabrics of synthetic spun fibers) | Product | 2 | 3 | 2 | 0 |  | China | Hong Kong | USA |
| 68 | Silk and artificial silk fabrics (inc. fabrics of synthetic filament fibers) | Product | 3 | 4 | 2 | 0 |  | China | Hong Kong | Vietnam |
| 69 | Woolen fabrics, hemp fabrics and other fabrics | Product | 1 | 1 | 0 | 0 |  | - | - | - |
| 70 | Knitting fabrics | Product | 1 | 1 | 1 | 0 |  | - | - | - |
| 71 | Yarn and fabric dyeing and finishing (processing on commission only) | Product | 0 | 0 | 0 | 0 |  | - | - | - |
| 72 | Ropes and nets | Product | 1 | 0 | 0 | 0 |  | - | - | - |
| 73 | Carpets and floor mats | Product | 0 | 0 | 0 | 0 |  | - | - | - |
| 74 | Fabricated textiles for medical use | Product | 0 | 0 | 0 | 0 |  | - | - | - |
| 75 | Other fabricated textile products | Product | 2 | 3 | 2 | 0 |  | China | Hong Kong | USA |
| 76 | Woven fabric apparel | Product | 1 | 1 | 0 | 0 |  | - | - | - |
| 77 | Knitted apparel | Product | 0 | 1 | 0 | 0 |  | - | - | - |
| 78 | Other wearing apparel and clothing accessories | Product | 0 | 0 | 0 | 0 |  | - | - | - |
| 79 | Bedding | Product | 0 | 0 | 0 | 0 |  | - | - | - |
| 80 | Other ready-made textile products | Product | 0 | 1 | 0 | 0 |  | - | - | - |
| 81 | Timber | Product | 0 | 0 | 0 | 0 |  | - | - | - |
| 82 | Plywood | Product | 0 | 0 | 0 | 0 |  | - | - | - |
| 83 | Wooden chips | Product | 0 | 0 | 0 | 0 |  | - | - | - |
| 84 | Wooden products for construction | Product | 1 | 2 | 1 | 0 |  | S. Korea | S. Korea | S. Korea |
| 85 | Wooden furniture and fixtures | Product | 18 | 29 | 12 | 1 |  | USA | China | UK |
| 86 | Wooden fixtures | Product | 1 | 0 | 0 | 0 |  | - | - | - |
| 87 | Metallic furniture and fixture | Product | 19 | 28 | 9 | 1 |  | USA | China | Taiwan |
| 88 | Pulp | Product | 0 | 0 | 0 | 0 |  | - | - | - |
| 89 | Used paper | Product | 0 | 0 | 0 | 0 |  | - | - | - |
| 90 | Paper | Product | 4 | 5 | 2 | 0 |  | China | USA | Hong Kong |
| 91 | Paperboard | Product | 0 | 0 | 0 | 0 |  | - | - | - |
|  |  |  | Alloying elements mass accompanying with Export (t) | | | |  | Top 3 counter partner of export in terms of mass of accompanying alloying element | | |
| No. | Commodity | Category | Mn | Cr | Ni | Mo |  | 1 | 2 | 3 |
| 92 | Corrugated cardboard | Product | 0 | 0 | 0 | 0 |  | - | - | - |
| 93 | Coated paper and building (construction) paper | Product | 3 | 3 | 2 | 0 |  | USA | China | Hong Kong |
| 94 | Corrugated card board boxes | Product | 0 | 0 | 0 | 0 |  | - | - | - |
| 95 | Other paper containers | Product | 0 | 0 | 0 | 0 |  | - | - | - |
| 96 | Paper textile for medical use | Product | 0 | 1 | 0 | 0 |  | - | - | - |
| 97 | Other pulp, paper and processed paper products | Product | 1 | 2 | 1 | 0 |  | China | USA | Hong Kong |
| 98 | Printing, plate making and book binding | Product | 1 | 2 | 1 | 0 |  | China | USA | S. Korea |
| 99 | Chemical fertilizer | Product | 0 | 0 | 0 | 0 |  | - | - | - |
| 100 | Soda ash | Product | 1 | 1 | 0 | 0 |  | - | - | - |
| 101 | Titanium oxide | Product | 14 | 14 | 7 | 1 |  | S. Korea | S. Korea | S. Korea |
| 102 | Compressed gas and liquefied gas | Product | 0 | 0 | 0 | 0 |  | - | - | - |
| 103 | Crude salt | Product | 0 | 0 | 0 | 0 |  | - | - | - |
| 104 | Other industrial inorganic chemicals | Product | 26 | 43 | 50 | 6 |  | Taiwan | S. Korea | China |
| 105 | Ethylene | Product | 1 | 2 | 1 | 0 |  | - | - | - |
| 106 | Pure benzene | Product | 5 | 6 | 3 | 0 |  | S. Korea | S. Korea | S. Korea |
| 107 | Synthetic alcohol | Product | 17 | 20 | 9 | 1 |  | S. Korea | S. Korea | S. Korea |
| 108 | Styrene monomer | Product | 35 | 30 | 22 | 2 |  | S. Korea | S. Korea | S. Korea |
| 109 | Synthetic rubber | Product | 6 | 7 | 3 | 0 |  | China | USA | Thailand |
| 110 | Methane derivatives | Product | 2 | 2 | 1 | 0 |  | S. Korea | China | Taiwan |
| 111 | Oil and fat industrial chemicals | Product | 1 | 1 | 0 | 0 |  | - | - | - |
| 112 | Plasticizers | Product | 0 | 0 | 0 | 0 |  | - | - | - |
| 113 | Synthetic dyes | Product | 2 | 2 | 2 | 0 |  | Taiwan | S. Korea | USA |
| 114 | Other industrial organic chemicals | Product | 43 | 21 | 9 | 1 |  | S. Korea | USA | China |
| 115 | Rayon and acetate | Product | 1 | 2 | 1 | 0 |  | China | S. Korea | India |
| 116 | Synthetic fibers | Product | 5 | 6 | 3 | 0 |  | China | USA | Hong Kong |
| 117 | Medicaments | Product | 34 | 28 | 12 | 1 |  | USA | France | S. Korea |
| 118 | Soap and synthetic detergents | Product | 5 | 3 | 2 | 0 |  | S. Korea | S. Korea | S. Korea |
| 119 | Cosmetics, toilet preparations and dentifrices | Product | 10 | 7 | 3 | 0 |  | Taiwan | S. Korea | Hong Kong |
| 120 | Paint and varnishes | Product | 44 | 19 | 9 | 1 |  | Taiwan | S. Korea | China |
| 121 | Printing ink | Product | 15 | 7 | 3 | 0 |  | USA | China | Hong Kong |
| 122 | Photographic sensitive materials | Product | 52 | 88 | 85 | 9 |  | USA | Taiwan | S. Korea |
| 123 | Agricultural chemicals | Product | 3 | 2 | 1 | 0 |  | S. Korea | USA | Philippines |
| 124 | Gelatin and adhesives | Product | 5 | 4 | 2 | 0 |  | China | Taiwan | S. Korea |
| 125 | Catalyzer | Product | 59 | 62 | 46 | 4 |  | S. Korea | S. Korea | S. Korea |
| 126 | Gasoline | Product | 3 | 2 | 1 | 0 |  | S. Korea | S. Korea | S. Korea |
| 127 | Coke | Product | 1 | 1 | 0 | 0 |  | - | - | - |
| 128 | Paving materials | Product | 0 | 0 | 0 | 0 |  | - | - | - |
| 129 | Plastic films and sheets | Product | 112 | 353 | 174 | 9 |  | S. Korea | S. Korea | S. Korea |
| 130 | Tires and inner tubes | Product | 81 | 96 | 35 | 3 |  | USA | Australia | Belgium |
| 131 | Rubber footwear | Product | 0 | 0 | 0 | 0 |  | - | - | - |
| 132 | Plastic footwear | Product | 0 | 0 | 0 | 0 |  | - | - | - |
| 133 | Other rubber products | Product | 62 | 62 | 25 | 1 |  | USA | China | Thailand |
| 134 | Leather footwear | Product | 0 | 0 | 0 | 0 |  | - | - | - |
| 135 | Leather and fur skins | Product | 0 | 0 | 0 | 0 |  | - | - | - |
| 136 | Miscellaneous leather products | Product | 1 | 1 | 1 | 0 |  | - | - | - |
| 137 | Sheet glass | Product | 11 | 14 | 6 | 0 |  | S. Korea | S. Korea | S. Korea |
| 138 | Glass fiber and glass fiber products, n.e.c. | Product | 7 | 10 | 5 | 0 |  | Taiwan | China | USA |
| 139 | Other glass products, n.e.c. | Product | 15 | 20 | 13 | 1 |  | S. Korea | S. Korea | S. Korea |
| 140 | Cement | Product | 2 | 3 | 1 | 0 |  | S. Korea | Hong Kong | Singapore |
| 141 | Ready mixed concrete | Product | 0 | 0 | 0 | 0 |  | - | - | - |
| 142 | Cement products | Product | 4 | 1 | 0 | 0 |  | Russia | USA | Philippines |
|  |  |  | Alloying elements mass accompanying with Export (t) | | | |  | Top 3 counter partner of export in terms of mass of accompanying alloying element | | |
| No. | Commodity | Category | Mn | Cr | Ni | Mo |  | 1 | 2 | 3 |
| 143 | Pottery, china and earthenware for construction | Product | 19 | 21 | 12 | 1 |  | S. Korea | S. Korea | S. Korea |
| 144 | Clay refractories | Product | 3 | 4 | 3 | 0 |  | Taiwan | S. Korea | USA |
| 145 | Other structural clay products | Product | 1 | 1 | 0 | 0 |  | - | - | - |
| 146 | Carbon and graphite products | Product | 19 | 12 | 6 | 0 |  | S. Korea | China | USA |
| 147 | Abrasive | Product | 4 | 5 | 3 | 0 |  | Taiwan | China | USA |
| 148 | Miscellaneous ceramic, stone and clay products | Product | 54 | 16 | 6 | 0 |  | USA | S. Korea | Taiwan |
| 149 | BOF-Ordinary section steel | Product | 0 | 0 | 0 | 0 |  | - | - | - |
| 150 | BOF-Ordinary steel sheets and plates | Product | 0 | 0 | 0 | 0 |  | - | - | - |
| 151 | BOF-Ordinary steel strip | Product | 0 | 0 | 0 | 0 |  | - | - | - |
| 152 | BOF-Ordinary steel bar | Product | 0 | 0 | 0 | 0 |  | - | - | - |
| 153 | BOF-Other hot-rolled ordinary steel | Product | 0 | 0 | 0 | 0 |  | - | - | - |
| 154 | BOF-Ordinary steel pipe | Product | 0 | 0 | 0 | 0 |  | - | - | - |
| 155 | BOF-Cold-finished ordinary steel | Product | 0 | 0 | 0 | 0 |  | - | - | - |
| 156 | BOF-Coated steel | Product | 0 | 0 | 0 | 0 |  | - | - | - |
| 157 | BOF-Other ordinary steel | Product | 0 | 0 | 0 | 0 |  | - | - | - |
| 158 | BOF-Carbon tool steel | Product | 0 | 0 | 0 | 0 |  | - | - | - |
| 159 | BOF-Alloy tool steel | Product | 0 | 0 | 0 | 0 |  | - | - | - |
| 160 | BOF-High speed steel | Product | 0 | 0 | 0 | 0 |  | - | - | - |
| 161 | BOF-Other tool steel | Product | 0 | 0 | 0 | 0 |  | - | - | - |
| 162 | BOF-Structural carbon steel | Product | 0 | 0 | 0 | 0 |  | - | - | - |
| 163 | BOF-Structural alloy steel | Product | 0 | 0 | 0 | 0 |  | - | - | - |
| 164 | BOF-Spring steel | Product | 0 | 0 | 0 | 0 |  | - | - | - |
| 165 | BOF-Bearing steel | Product | 0 | 0 | 0 | 0 |  | - | - | - |
| 166 | BOF-Ferric stainless steel | Product | 0 | 0 | 0 | 0 |  | - | - | - |
| 167 | BOF-Austenitic stainless steel | Product | 0 | 0 | 0 | 0 |  | - | - | - |
| 168 | BOF-Heat-resistant steel | Product | 0 | 0 | 0 | 0 |  | - | - | - |
| 169 | BOF-Free-cutting steel | Product | 0 | 0 | 0 | 0 |  | - | - | - |
| 170 | BOF-Piano wire rod | Product | 0 | 0 | 0 | 0 |  | - | - | - |
| 171 | BOF-High-tensile steel | Product | 0 | 0 | 0 | 0 |  | - | - | - |
| 172 | BOF-Weathering steel | Product | 0 | 0 | 0 | 0 |  | - | - | - |
| 173 | BOF-Low-temp. steel | Product | 0 | 0 | 0 | 0 |  | - | - | - |
| 174 | BOF-High-tensile steel pipe | Product | 0 | 0 | 0 | 0 |  | - | - | - |
| 175 | BOF-Other special use steel | Product | 0 | 0 | 0 | 0 |  | - | - | - |
| 176 | BOF-Stainless steel pipe | Product | 0 | 0 | 0 | 0 |  | - | - | - |
| 177 | BOF-Other special steel | Product | 0 | 0 | 0 | 0 |  | - | - | - |
| 178 | EAF-Ordinary section steel | Product | 36 | 0 | 0 | 0 |  | S. Korea | Taiwan | China |
| 179 | EAF-Ordinary steel sheets and plates | Product | 20 | 0 | 0 | 0 |  | S. Korea | Taiwan | China |
| 180 | EAF-Ordinary steel strip | Product | 0 | 0 | 0 | 0 |  | - | - | - |
| 181 | EAF-Ordinary steel bar | Product | 78 | 0 | 0 | 0 |  | S. Korea | Taiwan | China |
| 182 | EAF-Other hot-rolled ordinary steel | Product | 16 | 0 | 0 | 0 |  | S. Korea | Taiwan | China |
| 183 | EAF-Ordinary steel pipe | Product | 15 | 0 | 0 | 0 |  | S. Korea | Taiwan | China |
| 184 | EAF-Cold-finished ordinary steel | Product | 1 | 0 | 0 | 0 |  | - | - | - |
| 185 | EAF-Coated steel | Product | 2 | 0 | 0 | 0 |  | - | - | - |
| 186 | EAF-Other ordinary steel | Product | 3 | 0 | 0 | 0 |  | - | - | - |
| 187 | EAF-Carbon tool steel | Product | 0 | 0 | 0 | 0 |  | - | - | - |
| 188 | EAF-Alloy tool steel | Product | 1 | 10 | 5 | 4 |  | S. Korea | Taiwan | China |
| 189 | EAF-High speed steel | Product | 0 | 2 | 0 | 0 |  | - | - | - |
| 190 | EAF-Other tool steel | Product | 0 | 0 | 0 | 0 |  | - | - | - |
| 191 | EAF-Structural carbon steel | Product | 31 | 0 | 0 | 1 |  | S. Korea | Taiwan | China |
| 192 | EAF-Structural alloy steel | Product | 26 | 63 | 50 | 3 |  | S. Korea | Taiwan | China |
| 193 | EAF-Spring steel | Product | 3 | 3 | 0 | 0 |  | S. Korea | Taiwan | China |
|  |  |  | Alloying elements mass accompanying with Export (t) | | | |  | Top 3 counter partner of export in terms of mass of accompanying alloying element | | |
| No. | Commodity | Category | Mn | Cr | Ni | Mo |  | 1 | 2 | 3 |
| 194 | EAF-Bearing steel | Product | 2 | 14 | 3 | 1 |  | S. Korea | Taiwan | China |
| 195 | EAF-Ferric stainless steel | Product | 6 | 172 | 0 | 1 |  | S. Korea | Taiwan | China |
| 196 | EAF-Austenitic stainless steel | Product | 8 | 205 | 138 | 2 |  | S. Korea | Taiwan | China |
| 197 | EAF-Heat-resistant steel | Product | 1 | 11 | 1 | 1 |  | S. Korea | Taiwan | China |
| 198 | EAF-Free-cutting steel | Product | 9 | 0 | 0 | 0 |  | S. Korea | Taiwan | China |
| 199 | EAF-Piano wire rod | Product | 1 | 0 | 0 | 0 |  | - | - | - |
| 200 | EAF-High-tensile steel | Product | 4 | 0 | 0 | 0 |  | S. Korea | Taiwan | China |
| 201 | EAF-Weathering steel | Product | 1 | 0 | 0 | 0 |  | - | - | - |
| 202 | EAF-Low-temp. steel | Product | 0 | 0 | 0 | 0 |  | - | - | - |
| 203 | EAF-High-tensile steel pipe | Product | 2 | 0 | 0 | 0 |  | - | - | - |
| 204 | EAF-Other special use steel | Product | 0 | 0 | 0 | 0 |  | - | - | - |
| 205 | EAF-Stainless steel pipe | Product | 2 | 44 | 21 | 0 |  | S. Korea | Taiwan | China |
| 206 | EAF-Other special steel | Product | 9 | 51 | 21 | 1 |  | S. Korea | Taiwan | China |
| 207 | Ordinary section steel | Product | 2,668 | 0 | 0 | 0 |  | S. Korea | China | Taiwan |
| 208 | Ordinary steel sheets and plates | Product | 21,599 | 548 | 3 | 5 |  | S. Korea | China | Philippines |
| 209 | Ordinary steel strip | Product | 17,824 | 37 | 28 | 0 |  | S. Korea | Thailand | Taiwan |
| 210 | Ordinary steel bar | Product | 1,980 | 0 | 0 | 0 |  | S. Korea | USA | Thailand |
| 211 | Other hot-rolled ordinary steel | Product | 2,602 | 171 | 100 | 30 |  | Taiwan | S. Korea | USA |
| 212 | Carbon tool steel | Product | 237 | 54 | 42 | 1 |  | China | S. Korea | Taiwan |
| 213 | Alloy tool steel | Product | 63 | 938 | 464 | 349 |  | Taiwan | China | Singapore |
| 214 | High speed steel | Product | 8 | 180 | 0 | 0 |  | S. Korea | Taiwan | China |
| 215 | Other tool steel | Product | 0 | 0 | 0 | 0 |  | - | - | - |
| 216 | Structural carbon steel | Product | 2,977 | 550 | 0 | 85 |  | Thailand | S. Korea | Indonesia |
| 217 | Structural alloy steel | Product | 5,225 | 12,298 | 6,055 | 571 |  | Thailand | S. Korea | Taiwan |
| 218 | Spring steel | Product | 241 | 200 | 1 | 9 |  | USA | Thailand | China |
| 219 | Bearing steel | Product | 286 | 1,745 | 363 | 79 |  | China | S. Korea | Taiwan |
| 220 | Ferric stainless steel | Product | 2,530 | 74,098 | 0 | 678 |  | China | S. Korea | Taiwan |
| 221 | Austenitic stainless steel | Product | 2,311 | 60,008 | 35,557 | 690 |  | China | S. Korea | Hong Kong |
| 222 | Heat-resistant steel | Product | 475 | 7,339 | 416 | 482 |  | China | S. Korea | Taiwan |
| 223 | Free-cutting steel | Product | 1,058 | 0 | 0 | 33 |  | Taiwan | China | S. Korea |
| 224 | Piano wire rod | Product | 907 | 11 | 9 | 0 |  | Malaysia | Indonesia | China |
| 225 | High-tensile steel | Product | 5,199 | 0 | 0 | 32 |  | China | USA | S. Korea |
| 226 | Weathering steel | Product | 2,675 | 1,394 | 376 | 26 |  | China | USA | S. Korea |
| 227 | Low-temp. steel | Product | 529 | 0 | 0 | 5 |  | China | USA | S. Korea |
| 228 | High-tensile steel pipe | Product | 10,994 | 0 | 0 | 71 |  | China | USA | Norway |
| 229 | Other special use steel | Product | 1,940 | 243 | 0 | 2 |  | China | S. Korea | Taiwan |
| 230 | Stainless steel pipe | Product | 1,149 | 32,474 | 16,901 | 336 |  | USA | Norway | China |
| 231 | Steel pipe (Ordinary steel) | Product | 19,017 | 0 | 0 | 0 |  | China | Malaysia | USA |
| 232 | Cold finished steel (Ordinary steel) | Product | 12,567 | 372 | 406 | 16 |  | China | Thailand | Indonesia |
| 233 | Coated steel (Ordinary steel) | Product | 16,657 | 5 | 8 | 1 |  | China | Thailand | S. Korea |
| 234 | Cast and forged steel | Product | 119 | 495 | 200 | 13 |  | Taiwan | S. Korea | China |
| 235 | Cast iron pipes and tubes | Product | 11 | 2 | 1 | 0 |  | Kuwait | Qatar | Singapore |
| 236 | Cast materials (iron) | Product | 6 | 4 | 1 | 0 |  | S. Korea | China | USA |
| 237 | Forged materials (iron) | Product | 21 | 11 | 3 | 0 |  | USA | France | Philippines |
| 238 | Iron and steel shearing and slitting | Product | 0 | 0 | 0 | 0 |  | - | - | - |
| 239 | Other iron or steel products | Product | 80 | 78 | 25 | 2 |  | S. Korea | China | USA |
| 240 | Electric wires and cables | Product | 35 | 19 | 13 | 1 |  | China | USA | Hong Kong |
| 241 | Optical fiber cables | Product | 17 | 11 | 7 | 1 |  | For Order | USA | Hong Kong |
| 242 | Rolled and drawn copper and copper alloys | Product | 1 | 47 | 83 | 10 |  | China | S. Korea | Taiwan |
| 243 | Rolled and drawn aluminum | Product | 1 | 5 | 7 | 1 |  | China | Taiwan | Thailand |
| 244 | Non-ferrous metal castings and forgings | Product | 1 | 3 | 4 | 0 |  | China | S. Korea | USA |
|  |  |  | Alloying elements mass accompanying with Export (t) | | | |  | Top 3 counter partner of export in terms of mass of accompanying alloying element | | |
| No. | Commodity | Category | Mn | Cr | Ni | Mo |  | 1 | 2 | 3 |
| 245 | Nuclear fuels | Product | 0 | 0 | 0 | 0 |  | - | - | - |
| 246 | Other non-ferrous metal products | Product | 3 | 326 | 594 | 71 |  | Taiwan | China | Malaysia |
| 247 | Metal products for construction | Product | 258 | 260 | 128 | 3 |  | Taiwan | China | Singapore |
| 248 | Metal products for architecture | Product | 24 | 3 | 1 | 0 |  | Philippines | Singapore | S. Korea |
| 249 | Gas and oil appliances and heating and cooking apparatus | Product | 155 | 1,142 | 361 | 26 |  | USA | Australia | France |
| 250 | Bolts, nuts, rivets and springs | Product | 1,022 | 2,870 | 1,437 | 37 |  | USA | China | Thailand |
| 251 | Metal containers, fabricated plate and sheet metal | Product | 171 | 40 | 17 | 1 |  | Taiwan | S. Korea | USA |
| 252 | Plumber's supplies | Product | 307 | 118 | 59 | 6 |  | USA | China | Germany |
| 253 | Stamped and pressed metal products | Product | 1,286 | 1,583 | 517 | 37 |  | USA | China | Taiwan |
| 254 | Boilers | Product | 97 | 138 | 67 | 3 |  | Thailand | S. Korea | China |
| 255 | Turbines | Product | 487 | 1,118 | 551 | 23 |  | China | USA | Taiwan |
| 256 | Engines | Product | 698 | 1,150 | 549 | 24 |  | USA | China | S. Korea |
| 257 | Conveyors | Product | 702 | 546 | 245 | 16 |  | Taiwan | China | USA |
| 258 | Refrigerators and air conditioning apparatus | Product | 138 | 319 | 111 | 8 |  | China | USA | Spain |
| 259 | Pumps and compressors | Product | 1,504 | 2,562 | 1,173 | 82 |  | USA | China | S. Korea |
| 260 | Machinists' precision tools | Product | 845 | 1,811 | 840 | 58 |  | USA | China | Thailand |
| 261 | Other general industrial machinery and equipment | Product | 2,280 | 4,026 | 1,863 | 132 |  | USA | China | Thailand |
| 262 | Machinery and equipment for construction and mining | Product | 2,515 | 4,759 | 2,248 | 78 |  | USA | China | Australia |
| 263 | Chemical machinery | Product | 474 | 621 | 275 | 17 |  | USA | China | Taiwan |
| 264 | Industrial robots | Product | 597 | 717 | 303 | 19 |  | USA | S. Korea | Taiwan |
| 265 | Metal machine tools | Product | 1,470 | 2,182 | 994 | 69 |  | USA | China | S. Korea |
| 266 | Metal processing machinery | Product | 592 | 621 | 277 | 19 |  | China | USA | S. Korea |
| 267 | Machinery for agricultural use | Product | 122 | 147 | 67 | 5 |  | S. Korea | USA | China |
| 268 | Textile machinery | Product | 504 | 514 | 228 | 15 |  | China | Hong Kong | India |
| 269 | Food processing machinery and equipment | Product | 799 | 375 | 170 | 12 |  | Taiwan | S. Korea | USA |
| 270 | Semiconductor making equipment | Product | 1,038 | 2,591 | 807 | 40 |  | Taiwan | USA | S. Korea |
| 271 | Vacuum equipment and vacuum component | Product | 159 | 257 | 118 | 8 |  | S. Korea | Germany | USA |
| 272 | Sawmill, wood working, veneer and plywood machinery | Product | 1,764 | 2,242 | 1,048 | 50 |  | Taiwan | S. Korea | China |
| 273 | Metal molds | Product | 459 | 845 | 383 | 27 |  | China | USA | Thailand |
| 274 | Bearings | Product | 1,889 | 4,668 | 2,186 | 154 |  | USA | China | S. Korea |
| 275 | Other general machines and parts | Product | 746 | 1,832 | 858 | 57 |  | USA | China | S. Korea |
| 276 | Copy machine | Product | 52 | 133 | 44 | 3 |  | USA | China | Hong Kong |
| 277 | Other office machines | Product | 31 | 74 | 27 | 2 |  | USA | Hong Kong | China |
| 278 | Vending machines | Product | 52 | 59 | 20 | 1 |  | USA | China | S. Korea |
| 279 | Generators | Product | 706 | 2,153 | 667 | 34 |  | USA | Germany | China |
| 280 | Transformers and reactors | Product | 150 | 290 | 91 | 5 |  | China | USA | Hong Kong |
| 281 | Relay switches and switchboards | Product | 1,128 | 2,251 | 731 | 38 |  | China | USA | S. Korea |
| 282 | Wiring devices and supplies | Product | 307 | 499 | 186 | 11 |  | China | Hong Kong | S. Korea |
| 283 | Electrical equipment for internal combustion engines | Product | 400 | 568 | 216 | 11 |  | USA | Germany | UK |
| 284 | Other electrical devices and parts | Product | 359 | 708 | 227 | 13 |  | USA | China | Taiwan |
| 285 | Applied electronic equipment | Product | 172 | 295 | 129 | 9 |  | USA | Germany | S. Korea |
| 286 | Electric measuring instruments | Product | 257 | 603 | 252 | 16 |  | USA | S. Korea | China |
| 287 | Electric bulbs | Product | 18 | 28 | 17 | 1 |  | Taiwan | S. Korea | China |
| 288 | Electric lighting fixtures and apparatus | Product | 95 | 47 | 18 | 1 |  | USA | China | Thailand |
| 289 | Batteries | Product | 215 | 489 | 223 | 17 |  | China | USA | Hong Kong |
| 290 | Other electrical devices and parts | Product | 633 | 1,610 | 1,151 | 113 |  | USA | S. Korea | Taiwan |
| 291 | Household air-conditioners | Product | 101 | 126 | 44 | 3 |  | China | USA | UK |
| 292 | Household electric appliances (except air-conditioners) | Product | 144 | 258 | 78 | 4 |  | USA | China | Taiwan |
| 293 | Video recording and playback equipment | Product | 770 | 1,459 | 558 | 36 |  | USA | Netherlands | Hong Kong |
| 294 | Electric audio equipment | Product | 108 | 146 | 55 | 3 |  | China | USA | Hong Kong |
| 295 | Radio and television sets | Product | 47 | 121 | 47 | 3 |  | USA | Australia | Hong Kong |
|  |  |  | Alloying elements mass accompanying with Export (t) | | | |  | Top 3 counter partner of export in terms of mass of accompanying alloying element | | |
| No. | Commodity | Category | Mn | Cr | Ni | Mo |  | 1 | 2 | 3 |
| 296 | Wired communication equipment | Product | 14 | 28 | 11 | 1 |  | USA | Germany | UAE |
| 297 | Cellular phones | Product | 19 | 32 | 15 | 1 |  | USA | France | Hong Kong |
| 298 | Radio communication equipment (except cellular phones) | Product | 60 | 79 | 35 | 2 |  | USA | China | UK |
| 299 | Other communication equipment | Product | 26 | 47 | 19 | 1 |  | Taiwan | China | Hong Kong |
| 300 | Personal Computers | Product | 136 | 214 | 99 | 8 |  | USA | China | Belgium |
| 301 | Electronic computing equipment (except personal computers) | Product | 33 | 52 | 24 | 2 |  | USA | Taiwan | Hong Kong |
| 302 | Electronic computing equipment (accessory equipment) | Product | 426 | 906 | 371 | 25 |  | USA | Netherlands | China |
| 303 | Semiconductor devices | Product | 165 | 373 | 224 | 20 |  | China | Hong Kong | Germany |
| 304 | Integrated circuits | Product | 524 | 1,217 | 688 | 60 |  | Hong Kong | China | Taiwan |
| 305 | Electron tubes | Product | 47 | 83 | 39 | 2 |  | Mexico | USA | Czech |
| 306 | Liquid crystal element | Product | 49 | 70 | 46 | 4 |  | China | Hong Kong | USA |
| 307 | Magnetic tapes and discs | Product | 68 | 124 | 46 | 2 |  | USA | Netherlands | China |
| 308 | Other electronic components | Product | 755 | 1,456 | 673 | 52 |  | China | Hong Kong | USA |
| 309 | Passenger motor cars | Product | 24,347 | 42,091 | 10,016 | 1,315 |  | USA | Australia | UK |
| 310 | Trucks, buses and other cars | Product | 2,990 | 5,414 | 1,277 | 169 |  | Australia | USA | Thailand |
| 311 | Two-wheel motor vehicles | Product | 1,167 | 2,150 | 557 | 66 |  | USA | Italy | France |
| 312 | Motor vehicle bodies | Product | 202 | 167 | 40 | 5 |  | Taiwan | USA | Philippines |
| 313 | Internal combustion engines for motor vehicles and parts | Product | 3,882 | 8,955 | 2,040 | 292 |  | USA | Thailand | China |
| 314 | Motor vehicle parts and accessories | Product | 8,910 | 16,034 | 4,332 | 482 |  | USA | China | Thailand |
| 315 | Steel ships | Product | 20,476 | 10,388 | 5,473 | 165 |  | Panama | Liberia | Hong Kong |
| 316 | Ships (except steel ships) | Product | 30 | 27 | 14 | 1 |  | USA | Russia | Mongolia |
| 317 | Internal combustion engines for vessels | Product | 652 | 1,523 | 793 | 28 |  | USA | S. Korea | China |
| 318 | Repair of ships | Product | 152 | 53 | 26 | 1 |  | S. Korea | S. Korea | S. Korea |
| 319 | Rolling stock | Product | 611 | 754 | 404 | 12 |  | Taiwan | USA | Panama |
| 320 | Repair of rolling stock | Product | 0 | 0 | 0 | 0 |  | - | - | - |
| 321 | Aircrafts | Product | 27 | 139 | 40 | 3 |  | USA | UK | Canada |
| 322 | Repair of aircrafts | Product | 2 | 4 | 2 | 0 |  | S. Korea | S. Korea | S. Korea |
| 323 | Bicycles | Product | 39 | 40 | 12 | 1 |  | Taiwan | Germany | USA |
| 324 | Transport equipment for industrial use | Product | 415 | 567 | 157 | 13 |  | Germany | Kazakhstan | Canada |
| 325 | Camera | Product | 20 | 69 | 31 | 2 |  | Taiwan | USA | S. Korea |
| 326 | Other photographic and optical instruments | Product | 137 | 220 | 109 | 8 |  | China | USA | Hong Kong |
| 327 | Watches and clocks | Product | 46 | 180 | 65 | 5 |  | Hong Kong | China | USA |
| 328 | Professional and scientific instruments | Product | 67 | 66 | 31 | 2 |  | USA | Germany | UK |
| 329 | Analytical instruments, testing machine, measuring instruments | Product | 289 | 351 | 167 | 12 |  | USA | S. Korea | China |
| 330 | Medical instruments | Product | 155 | 78 | 44 | 4 |  | USA | Germany | China |
| 331 | Toys and games | Product | 41 | 54 | 27 | 2 |  | USA | Hong Kong | Netherlands |
| 332 | Sporting and athletic goods | Product | 45 | 63 | 23 | 2 |  | USA | S. Korea | Hong Kong |
| 333 | Musical instruments | Product | 25 | 226 | 74 | 5 |  | USA | Belgium | China |
| 334 | Audio and video records, other information recording media | Product | 0 | 1 | 0 | 0 |  | - | - | - |
| 335 | Stationery | Product | 22 | 73 | 25 | 2 |  | USA | Hong Kong | France |
| 336 | Jewelry and adornments | Product | 14 | 86 | 79 | 9 |  | Hong Kong | China | Taiwan |
| 337 | "Tatami" (straw matting) and straw products | Product | 0 | 0 | 0 | 0 |  | - | - | - |
| 338 | Ordnance | Product | 1 | 13 | 6 | 0 |  | USA | UK | Canada |
| 339 | Miscellaneous manufacturing products | Product | 19 | 53 | 26 | 1 |  | USA | S. Korea | Thailand |
| 340 | Reuse and recycling | Product | 0 | 1 | 0 | 0 |  | - | - | - |
| 341 | Residential construction (wooden) | Product | 0 | 0 | 0 | 0 |  | - | - | - |
| 342 | Residential construction (non-wooden) | Product | 0 | 0 | 0 | 0 |  | - | - | - |
| 343 | Non-residential construction (wooden) | Product | 0 | 0 | 0 | 0 |  | - | - | - |
| 344 | Non-residential construction (non-wooden) | Product | 0 | 0 | 0 | 0 |  | - | - | - |
| 345 | Repair of construction | Product | 0 | 0 | 0 | 0 |  | - | - | - |
| 346 | Public construction of roads | Product | 0 | 0 | 0 | 0 |  | - | - | - |
|  |  |  | Alloying elements mass accompanying with Export (t) | | | |  | Top 3 counter partner of export in terms of mass of accompanying alloying element | | |
| No. | Commodity | Category | Mn | Cr | Ni | Mo |  | 1 | 2 | 3 |
| 347 | Public construction of rivers, drainages and others | Product | 0 | 0 | 0 | 0 |  | - | - | - |
| 348 | Agricultural public construction | Product | 0 | 0 | 0 | 0 |  | - | - | - |
| 349 | Railway construction | Product | 0 | 0 | 0 | 0 |  | - | - | - |
| 350 | Electric power facilities construction | Product | 0 | 0 | 0 | 0 |  | - | - | - |
| 351 | Telecommunication facilities construction | Product | 0 | 0 | 0 | 0 |  | - | - | - |
| 352 | Other civil engineering and construction | Product | 0 | 0 | 0 | 0 |  | - | - | - |
| 353 | Electricity | Product (Service) | - | - | - | - |  | - | - | - |
| 354 | Private power generation | Product (Service) | - | - | - | - |  | - | - | - |
| 355 | Gas supply | Product (Service) | - | - | - | - |  | - | - | - |
| 356 | Steam and hot water supply | Product (Service) | - | - | - | - |  | - | - | - |
| 357 | Water supply | Product (Service) | - | - | - | - |  | - | - | - |
| 358 | Industrial water supply | Product (Service) | - | - | - | - |  | - | - | - |
| 359 | Sewage disposal | Product (Service) | - | - | - | - |  | - | - | - |
| 360 | Waste management services (public) | Product (Service) | - | - | - | - |  | - | - | - |
| 361 | Waste management services (private) | Product (Service) | - | - | - | - |  | - | - | - |
| 362 | Wholesale trade | Product (Service) | - | - | - | - |  | - | - | - |
| 363 | Retail trade | Product (Service) | - | - | - | - |  | - | - | - |
| 364 | Financial service (imputed interest), public | Product (Service) | - | - | - | - |  | - | - | - |
| 365 | Life insurance | Product (Service) | - | - | - | - |  | - | - | - |
| 366 | Non-life insurance | Product (Service) | - | - | - | - |  | - | - | - |
| 367 | Real estate agencies and managers | Product (Service) | - | - | - | - |  | - | - | - |
| 368 | Real estate rental service | Product (Service) | - | - | - | - |  | - | - | - |
| 369 | House rent | Product (Service) | - | - | - | - |  | - | - | - |
| 370 | House rent (imputed house rent) | Product (Service) | - | - | - | - |  | - | - | - |
| 371 | Railway transport (passengers) | Product (Service) | - | - | - | - |  | - | - | - |
| 372 | Railway transport (freight) | Product (Service) | - | - | - | - |  | - | - | - |
| 373 | Bus transport service | Product (Service) | - | - | - | - |  | - | - | - |
| 374 | Hired car and taxi transport | Product (Service) | - | - | - | - |  | - | - | - |
| 375 | Road freight transport(except　Self-transport by private cars) | Product (Service) | - | - | - | - |  | - | - | - |
| 376 | Self-transport by private cars (passengers) | Product (Service) | - | - | - | - |  | - | - | - |
| 377 | Self-transport by private cars (freight) | Product (Service) | - | - | - | - |  | - | - | - |
| 378 | Ocean transport | Product (Service) | - | - | - | - |  | - | - | - |
| 379 | Coastal and inland water transport (passengers) | Product (Service) | - | - | - | - |  | - | - | - |
| 380 | Harbor transport service | Product (Service) | - | - | - | - |  | - | - | - |
| 381 | International air transport | Product (Service) | - | - | - | - |  | - | - | - |
| 382 | Consigned freight forwarding | Product (Service) | - | - | - | - |  | - | - | - |
| 383 | Storage facility service | Product (Service) | - | - | - | - |  | - | - | - |
| 384 | Packing service | Product (Service) | - | - | - | - |  | - | - | - |
| 385 | Facility service for road transport | Product (Service) | - | - | - | - |  | - | - | - |
| 386 | Port and water traffic control | Product (Service) | - | - | - | - |  | - | - | - |
| 387 | Services relating to water transport | Product (Service) | - | - | - | - |  | - | - | - |
| 388 | Airport and air traffic control (public) | Product (Service) | - | - | - | - |  | - | - | - |
| 389 | Airport and air traffic control (industrial) | Product (Service) | - | - | - | - |  | - | - | - |
| 390 | Services relating to air transport | Product (Service) | - | - | - | - |  | - | - | - |
| 391 | Travel agency and other services relating to transport | Product (Service) | - | - | - | - |  | - | - | - |
| 392 | Postal service and mail delivery | Product (Service) | - | - | - | - |  | - | - | - |
| 393 | Fixed telecommunication | Product (Service) | - | - | - | - |  | - | - | - |
| 394 | Mobile telecommunication | Product (Service) | - | - | - | - |  | - | - | - |
| 395 | Other telecommunication | Product (Service) | - | - | - | - |  | - | - | - |
| 396 | Other services relating to communication | Product (Service) | - | - | - | - |  | - | - | - |
| 397 | Public broadcasting | Product (Service) | - | - | - | - |  | - | - | - |
|  |  |  | Alloying elements mass accompanying with Export (t) | | | |  | Top 3 counter partner of export in terms of mass of accompanying alloying element | | |
| No. | Commodity | Category | Mn | Cr | Ni | Mo |  | 1 | 2 | 3 |
| 398 | Private broadcasting | Product (Service) | - | - | - | - |  | - | - | - |
| 399 | Cable broadcasting | Product (Service) | - | - | - | - |  | - | - | - |
| 400 | Computer programming and other software services | Product (Service) | - | - | - | - |  | - | - | - |
| 401 | Internet based services | Product (Service) | - | - | - | - |  | - | - | - |
| 402 | Image information production and distribution industry | Product (Service) | - | - | - | - |  | - | - | - |
| 403 | Newspaper | Product (Service) | - | - | - | - |  | - | - | - |
| 404 | Publication | Product (Service) | - | - | - | - |  | - | - | - |
| 405 | News syndicates and private detective agencies | Product (Service) | - | - | - | - |  | - | - | - |
| 406 | Public administration (central) | Product (Service) | - | - | - | - |  | - | - | - |
| 407 | Public administration (local) | Product (Service) | - | - | - | - |  | - | - | - |
| 408 | School education (public) | Product (Service) | - | - | - | - |  | - | - | - |
| 409 | School education (private) | Product (Service) | - | - | - | - |  | - | - | - |
| 410 | Social education (public) | Product (Service) | - | - | - | - |  | - | - | - |
| 411 | Social education (private, non-profit) | Product (Service) | - | - | - | - |  | - | - | - |
| 412 | Other educational and training institutions (public) | Product (Service) | - | - | - | - |  | - | - | - |
| 413 | Other educational and training institutions (profit-making) | Product (Service) | - | - | - | - |  | - | - | - |
| 414 | Research institutes for natural science (pubic) | Product (Service) | - | - | - | - |  | - | - | - |
| 415 | Research institutes for cultural and social science (public) | Product (Service) | - | - | - | - |  | - | - | - |
| 416 | Research institutes for natural sciences (private, non-profit) | Product (Service) | - | - | - | - |  | - | - | - |
| 417 | Research institutes for cultural and social science (private, non-profit) | Product (Service) | - | - | - | - |  | - | - | - |
| 418 | Research institutes for natural sciences (profit-making) | Product (Service) | - | - | - | - |  | - | - | - |
| 419 | Research institutes for cultural and social science (profit-making) | Product (Service) | - | - | - | - |  | - | - | - |
| 420 | Research and development (intra-enterprise) | Product (Service) | - | - | - | - |  | - | - | - |
| 421 | Medical service (public) | Product (Service) | - | - | - | - |  | - | - | - |
| 422 | Medical service (non-profit foundations, etc.) | Product (Service) | - | - | - | - |  | - | - | - |
| 423 | Medical service (medical corporations, etc.) | Product (Service) | - | - | - | - |  | - | - | - |
| 424 | Health and hygiene (public) | Product (Service) | - | - | - | - |  | - | - | - |
| 425 | Health and hygiene (profit-making) | Product (Service) | - | - | - | - |  | - | - | - |
| 426 | Social insurance (public) | Product (Service) | - | - | - | - |  | - | - | - |
| 427 | Social insurance (private, non-profit) | Product (Service) | - | - | - | - |  | - | - | - |
| 428 | Social welfare (public) | Product (Service) | - | - | - | - |  | - | - | - |
| 429 | Social welfare (private, non-profit) | Product (Service) | - | - | - | - |  | - | - | - |
| 430 | Social welfare (profit-making) | Product (Service) | - | - | - | - |  | - | - | - |
| 431 | Nursing care (In-home) | Product (Service) | - | - | - | - |  | - | - | - |
| 432 | Nursing care (In-facility) | Product (Service) | - | - | - | - |  | - | - | - |
| 433 | Private non-profit institutions serving enterprises | Product (Service) | - | - | - | - |  | - | - | - |
| 434 | Private non-profit institutions serving households, n.e.c. | Product (Service) | - | - | - | - |  | - | - | - |
| 435 | Television and radio advertising services | Product (Service) | - | - | - | - |  | - | - | - |
| 436 | Industrial equipment and machinery rental and leasing (except construction machinery) | Product (Service) | - | - | - | - |  | - | - | - |
| 437 | Car rental and leasing | Product (Service) | - | - | - | - |  | - | - | - |
| 438 | Repair of motor vehicles | Product (Service) | - | - | - | - |  | - | - | - |
| 439 | Repair of machine | Product (Service) | - | - | - | - |  | - | - | - |
| 440 | Building maintenance services | Product (Service) | - | - | - | - |  | - | - | - |
| 441 | Judicial, financial and accounting services | Product (Service) | - | - | - | - |  | - | - | - |
| 442 | Civil engineering and construction services | Product (Service) | - | - | - | - |  | - | - | - |
| 443 | Worker dispatching services | Product (Service) | - | - | - | - |  | - | - | - |
| 444 | Other business services | Product (Service) | - | - | - | - |  | - | - | - |
| 445 | Movie theaters | Product (Service) | - | - | - | - |  | - | - | - |
| 446 | Performances (except otherwise classified), theatrical companies | Product (Service) | - | - | - | - |  | - | - | - |
| 447 | Amusement and recreation facilities | Product (Service) | - | - | - | - |  | - | - | - |
|  |  |  | Alloying elements mass accompanying with Export (t) | | | |  | Top 3 counter partner of export in terms of mass of accompanying alloying element | | |
| No. | Commodity | Category | Mn | Cr | Ni | Mo |  | 1 | 2 | 3 |
| 448 | Stadiums and companies of bicycle, horse, motorcar and motorboat races | Product (Service) | - | - | - | - |  | - | - | - |
| 449 | Sport facility service, public gardens and amusement parks | Product (Service) | - | - | - | - |  | - | - | - |
| 450 | Other amusement and recreation services | Product (Service) | - | - | - | - |  | - | - | - |
| 451 | General eating and drinking places (except coffee shops) | Product (Service) | - | - | - | - |  | - | - | - |
| 452 | Coffee shops | Product (Service) | - | - | - | - |  | - | - | - |
| 453 | Eating and drinking places for pleasures | Product (Service) | - | - | - | - |  | - | - | - |
| 454 | Accommodations | Product (Service) | - | - | - | - |  | - | - | - |
| 455 | Cleaning | Product (Service) | - | - | - | - |  | - | - | - |
| 456 | Barber shops | Product (Service) | - | - | - | - |  | - | - | - |
| 457 | Beauty shops | Product (Service) | - | - | - | - |  | - | - | - |
| 458 | Public baths | Product (Service) | - | - | - | - |  | - | - | - |
| 459 | Other cleaning, barber shops, beauty shops and public baths | Product (Service) | - | - | - | - |  | - | - | - |
| 460 | Photographic studios | Product (Service) | - | - | - | - |  | - | - | - |
| 461 | Ceremonial occasions | Product (Service) | - | - | - | - |  | - | - | - |
| 462 | Miscellaneous repairs, n.e.c. | Product (Service) | - | - | - | - |  | - | - | - |
| 463 | Supplementary tutorial schools, instruction services for arts, culture and technical skills | Product (Service) | - | - | - | - |  | - | - | - |
| 464 | Other personal services | Product (Service) | - | - | - | - |  | - | - | - |
| 465 | Office supplies | Product (Service) | - | - | - | - |  | - | - | - |
| 466 | Activities not elsewhere classified | Product | 14 | 5 | 2 | 0 |  | Malaysia | Hong Kong | Singapore |
| 467 | Mn material | material | 18,118 | - | - | - |  | S. Korea | Taiwan | China |
| 468 | Cr material | material | - | 7,233 | - | - |  | USA | S. Korea | Taiwan |
| 469 | Ni material | material | - | - | 71,721 | - |  | S. Korea | Taiwan | China |
| 470 | Mo material | material | - | - | - | 771 |  | S. Korea | Taiwan | China |
